# Supplementary material
Source: PubMed Central journal article supplement (PMC3268542)
Supplement: supp_mcr297_mcr297supp.pdf [file supp_mcr297_mcr297supp.pdf]

## SUPPLEMENTARY DATA

TABLE S1. Means ( $\pm$  s.e.) of root potential decomposition ( $K_{pot}$ ) and traits measured on 18 herbaceous species.

| Species | $K_{pot}$<br>(g kg <sup>-1</sup> d <sup>-1</sup> ) | Mass<br>remaining (%) | N<br>(mg g <sup>-1</sup> ) | P<br>(mg g <sup>-1</sup> ) | C/N  | Soluble<br>(mg g <sup>-1</sup> ) | Hemicellulose<br>(mg g <sup>-1</sup> ) | Cellulose<br>(mg g <sup>-1</sup> ) | Lignin<br>(mg g <sup>-1</sup> ) | Tissue density<br>(g cm <sup>-3</sup> ) | SRL<br>(m g <sup>-1</sup> ) | Diameter<br>(mm)  |
|---------|----------------------------------------------------|-----------------------|----------------------------|----------------------------|------|----------------------------------|----------------------------------------|------------------------------------|---------------------------------|-----------------------------------------|-----------------------------|-------------------|
| As      | 16.27                                              | 16.95 $\pm$ 0.67      | 13.3 $\pm$ 0.4             | –                          | 32.0 | 285 $\pm$ 12                     | 388 $\pm$ 12                           | 247 $\pm$ 26                       | 80 $\pm$ 25                     | 0.067 $\pm$ 0.006                       | 653 $\pm$ 59                | 0.209 $\pm$ 0.002 |
| Be      | 6.44                                               | 57.93 $\pm$ 1.22      | 5.3 $\pm$ 0.1              | 1.0 $\pm$ 0.05             | 84.5 | 167 $\pm$ 12                     | 393 $\pm$ 6                            | 332 $\pm$ 8                        | 109 $\pm$ 2                     | 0.139 $\pm$ 0.009                       | 113 $\pm$ 2                 | 0.266 $\pm$ 0.016 |
| Bm      | 8.23                                               | 44.85 $\pm$ 2.78      | 5.0 $\pm$ 0.1              | 1.1 $\pm$ 0.02             | 86.3 | 178 $\pm$ 6                      | 418 $\pm$ 5                            | 340 $\pm$ 2                        | 64.3 $\pm$ 1                    | 0.091 $\pm$ 0.001                       | 427 $\pm$ 42                | 0.212 $\pm$ 0.003 |
| Bp      | 7.96                                               | 53.71 $\pm$ 1.13      | 6.7 $\pm$ 1.1              | 1.2 $\pm$ 0.07             | 70.2 | 179 $\pm$ 14                     | 403 $\pm$ 4                            | 323 $\pm$ 6                        | 95.8 $\pm$ 6                    | 0.095 $\pm$ 0.005                       | 159 $\pm$ 17                | 0.250 $\pm$ 0.005 |
| Cf      | 13.43                                              | 36.83 $\pm$ 1.12      | 14.2 $\pm$ 0.3             | 2.5 $\pm$ 0.16             | 32.4 | 381 $\pm$ 16                     | 215 $\pm$ 11                           | 208 $\pm$ 3                        | 197 $\pm$ 3                     | 0.072 $\pm$ 0.008                       | 301 $\pm$ 23                | 0.256 $\pm$ 0.004 |
| Cn      | 6.99                                               | 60.54 $\pm$ 0.15      | 9.6 $\pm$ 0.7              | 1.6 $\pm$ 0.06             | 48.0 | 225 $\pm$ 9                      | 233 $\pm$ 6                            | 297 $\pm$ 10                       | 246 $\pm$ 2                     | 0.139 $\pm$ 0.006                       | 130 $\pm$ 17                | 0.268 $\pm$ 0.014 |
| Dc      | 22.06                                              | 6.58 $\pm$ 1.88       | 8.0 $\pm$ 0.2              | 1.5 $\pm$ 0.1              | 51.3 | 448 $\pm$ 15                     | 205 $\pm$ 11                           | 191 $\pm$ 5                        | 155 $\pm$ 9                     | 0.078 $\pm$ 0.001                       | 385 $\pm$ 15                | 0.254 $\pm$ 0.016 |
| Dg      | 7.34                                               | 47.65 $\pm$ 3.40      | 7.1 $\pm$ 0.2              | 1.1 $\pm$ 0.04             | 61.9 | 201 $\pm$ 19                     | 422 $\pm$ 17                           | 283 $\pm$ 3                        | 95.6 $\pm$ 4                    | 0.132 $\pm$ 0.006                       | 287 $\pm$ 27                | 0.213 $\pm$ 0.002 |
| Gr      | 6.28                                               | 65.02 $\pm$ 0.31      | 10.3 $\pm$ 0.3             | 2.0 $\pm$ 0.09             | 43.4 | 309 $\pm$ 5                      | 193 $\pm$ 2                            | 237 $\pm$ 6                        | 261 $\pm$ 5                     | 0.124 $\pm$ 0.006                       | 235 $\pm$ 13                | 0.231 $\pm$ 0.006 |
| Ic      | 22.28                                              | 36 $\pm$ 2.24         | 10.7 $\pm$ 0.3             | 2.0 $\pm$ 0.12             | 39.8 | 365 $\pm$ 13                     | 278 $\pm$ 8                            | 217 $\pm$ 10                       | 140 $\pm$ 16                    | 0.074 $\pm$ 0.001                       | 198 $\pm$ 27                | 0.334 $\pm$ 0.015 |
| Mm      | 15.86                                              | 36.77 $\pm$ 1.77      | 31.2 $\pm$ 0.5             | 1.9 $\pm$ 0.05             | 14.5 | 272 $\pm$ 10                     | 295 $\pm$ 10                           | 284 $\pm$ 5                        | 149 $\pm$ 3                     | 0.123 $\pm$ 0.009                       | 209 $\pm$ 21                | 0.257 $\pm$ 0.005 |
| Pb      | 12.81                                              | 37.05 $\pm$ 2.02      | 17.7 $\pm$ 0.6             | 1.6 $\pm$ 0.06             | 23.9 | 342 $\pm$ 6                      | 274 $\pm$ 20                           | 240 $\pm$ 12                       | 145 $\pm$ 6                     | 0.091 $\pm$ 0.006                       | 134 $\pm$ 11                | 0.343 $\pm$ 0.006 |
| Ph      | 21.23                                              | 16.36 $\pm$ 0.52      | 7.0 $\pm$ 0.0              | 1.3 $\pm$ 0.04             | 63.6 | 436 $\pm$ 9                      | 239 $\pm$ 4                            | 189 $\pm$ 3                        | 135 $\pm$ 7                     | 0.118 $\pm$ 0.002                       | 200 $\pm$ 7                 | 0.266 $\pm$ 0.008 |
| Rp      | 15.21                                              | 26.8 $\pm$ 1.96       | 13.4 $\pm$ 0.3             | 2.1 $\pm$ 0.08             | 29.1 | 402 $\pm$ 37                     | 283 $\pm$ 28                           | 162 $\pm$ 5                        | 154 $\pm$ 5                     | 0.143 $\pm$ 0.007                       | 106 $\pm$ 8                 | 0.334 $\pm$ 0.01  |
| Ta      | 13.58                                              | 28.62 $\pm$ 4.19      | 23.4 $\pm$ 0.7             | 2.0 $\pm$ 0.09             | 16.7 | 406 $\pm$ 13                     | 207 $\pm$ 7                            | 200 $\pm$ 2                        | 187 $\pm$ 4                     | 0.099 $\pm$ 0.004                       | 154 $\pm$ 4                 | 0.301 $\pm$ 0.01  |
| Tc      | 6.38                                               | 66.56 $\pm$ 0.62      | 19.7 $\pm$ 1.6             | 1.9 $\pm$ 0.57             | 22.2 | 313 $\pm$ 30                     | 254 $\pm$ 5                            | 234 $\pm$ 19                       | 200 $\pm$ 6                     | 0.114 $\pm$ 0.005                       | 134 $\pm$ 7                 | 0.289 $\pm$ 0.006 |
| Tm      | 28.36                                              | 6.64 $\pm$ 2.48       | 15.6 $\pm$ 0.2             | 2.8 $\pm$ 0.15             | 27.4 | 378 $\pm$ 36                     | 249 $\pm$ 28                           | 219 $\pm$ 6                        | 155 $\pm$ 12                    | 0.093 $\pm$ 0.012                       | 274 $\pm$ 25                | 0.252 $\pm$ 0.01  |
| Vp      | 14.2                                               | 30.3 $\pm$ 3.53       | 13.1 $\pm$ 0.3             | 2.3 $\pm$ 0.11             | 32.9 | 294 $\pm$ 7                      | 238 $\pm$ 7                            | 282 $\pm$ 7                        | 186 $\pm$ 5                     | 0.080 $\pm$ 0.009                       | 503 $\pm$ 26                | 0.230 $\pm$ 0.003 |

See Table 1 in the main text for species' abbreviations. Abbreviations for root traits:  $K_{pot}$ , root potential decomposition; N, nitrogen concentration; P, phosphorus concentration; Soluble, water-soluble compound concentration; Hemicellulose, hemicellulose concentration; Cellulose, cellulose concentration; SRL: specific root length.  $n = 3$  or 4 depending on the species and trait.
